# Supplementary material for: Impaired p53-Mediated DNA Damage Response Contributes to Microcephaly in Nijmegen Breakage Syndrome Patient-Derived Cerebral Organoids
Source: MDPI journal article supplement (doi:10.3390/cells11050802), 2022-02-25
Supplement: s1 [file s1]

Table S1: Overview of the iPSC lines used in this study

| IPCS line | Gender | Genotype                              | Age of the donor | Derived from             | Reprogramming method    | Karyotype                                                                |
|-----------|--------|---------------------------------------|------------------|--------------------------|-------------------------|--------------------------------------------------------------------------|
| NBS1      | f      | Homozygous<br><i>NBN</i><br>657del5   | 18               | Human dermal fibroblasts | Episomal reprogramming  | 46,XX                                                                    |
| NBS8      | m      | Heterozygous<br><i>NBN</i><br>657del5 | 7                | Human dermal fibroblasts | Retroviral transduction | 46,XX,add(5)(q22), der(11)t(5;11)(q14;q?23)[14]/46,idem, add(4)(q31)[10] |
| CTR1      | m      | -                                     |                  | newborn                  | Retroviral transduction | -                                                                        |
| CTR2      | m      | -                                     |                  | 51                       | Episomal reprogramming  | 46,XX                                                                    |

Table S5: Primer sequences used in this study

| Gene                              | Forward               | Reverse                  |
|-----------------------------------|-----------------------|--------------------------|
| <i>OTX2</i>                       | TGCAGGGGTTCTTCTGTGAT  | AGGGTCAGAGCAATTGACCA     |
| <i>ATM</i>                        | AGCTCGGATGCTTTCCTCAA  | CTCCATCGAGAAGGTCCACG     |
| <i>CDKN1A</i>                     | GGAAGACCATGTGGACCTGT  | GCGTTTGGAGTGGTAGAAA      |
| <i>DCX</i>                        | AAGACTTCAGCCAAGAGCCC  | GCGTAGAGATGGGAGACTGC     |
| <i>EMX1</i>                       | AGACGCAGGTGAAGGTGTGG  | CAGGCAGGCAGGCTCTCC       |
| <i>FOXA2</i>                      | CCACCACCAACCCACAAAATG | TGCAACACCGTCTCCCCAAAGT   |
| <i>FOXB1</i>                      | CCCTCCCATITCTGTACGTTT | CTGGCGGCTCTTAGAGAT       |
| <i>HOXA2</i>                      | TCAGCAAAATGCCCTCTCT   | TAGGCCAGCTCCACAGTTCT     |
| <i>HOXB2</i>                      | TITAGCCGTTTCGCTTAGAGG | CGGATAGCTGGAGACAGGAG     |
| <i>HOXB4</i>                      | ACACCCGCTAACAAATGAGG  | GCACGAAAGATGAGGGAGAG     |
| <i>HOXB6</i>                      | GAAGTGAAGAGCGGACTCAC  | CTGGGATCAGGGAGTCTTCA     |
| <i>MDM2</i>                       | AAACTGGGGAGTCTTGAGGG  | TGCACATTTGCCTGCTCCTC     |
| <i>MK167</i>                      | TCGTCCCAGTGGAAGAGTTG  | CGACCCCGCTCCTTTTGAT      |
| <i>NNAT</i>                       | CGGCTGGTACATCTTCCGC   | TGTCCCTGGAGGATTTGAAA     |
| <i>NNAT (bissulfite-specific)</i> | GGGTTAGGTAGTTTGTGGA   | CCCCCAAACCCTAATAAAT      |
| <i>PAX5</i>                       | AGGATGCCGCTGATGGAGTAC | TGGAGGAGTGAATCAGCTTGG    |
| <i>SOX2</i>                       | GAGCTTTGCAGGAAGTTTGC  | GCAAGAAGCCTCTCCTTGAA     |
| <i>TP53</i>                       | CAGGGCAGCTACGGTTTCC   | CAGTTGGCAAAACATCTTGTTGAG |
